# Dependencies among Editing Sites in Serotonin 2C Receptor mRNA

Liran Carmel<sup>1</sup>, Eugene V. Koonin<sup>2</sup>, Stella Dracheva<sup>3,4\*</sup>

**1** Department of Genetics, The Alexander Silberman Institute of Life Sciences, Faculty of Science, The Hebrew University of Jerusalem, Edmond J. Safra Campus, Givat Ram, Jerusalem, Israel, **2** National Center for Biotechnology Information, National Library of Medicine, National Institutes of Health, Bethesda, Maryland, United States of America, **3** James J. Peters Veterans Affairs Medical Center, Bronx, New York, United States of America, **4** Department of Psychiatry, Mount Sinai School of Medicine, New York, New York, United States of America

## Abstract

The serotonin 2C receptor (5-HT<sub>2C</sub>R)—a key regulator of diverse neurological processes—exhibits functional variability derived from editing of its pre-mRNA by site-specific adenosine deamination (A-to-I pre-mRNA editing) in five distinct sites. Here we describe a statistical technique that was developed for analysis of the dependencies among the editing states of the five sites. The statistical significance of the observed correlations was estimated by comparing editing patterns in multiple individuals. For both human and rat 5-HT<sub>2C</sub>R, the editing states of the physically proximal sites A and B were found to be strongly dependent. In contrast, the editing states of sites C and D, which are also physically close, seem not to be directly dependent but instead are linked through the dependencies on sites A and B, respectively. We observed pronounced differences between the editing patterns in humans and rats: in humans site A is the key determinant of the editing state of the other sites, whereas in rats this role belongs to site B. The structure of the dependencies among the editing sites is notably simpler in rats than it is in humans implying more complex regulation of 5-HT<sub>2C</sub>R editing and, by inference, function in the human brain. Thus, exhaustive statistical analysis of the 5-HT<sub>2C</sub>R editing patterns indicates that the editing state of sites A and B is the primary determinant of the editing states of the other three sites, and hence the overall editing pattern. Taken together, these findings allow us to propose a mechanistic model of concerted action of ADAR1 and ADAR2 in 5-HT<sub>2C</sub>R editing. Statistical approach developed here can be applied to other cases of interdependencies among modification sites in RNA and proteins.

**Citation:** Carmel L, Koonin EV, Dracheva S (2012) Dependencies among Editing Sites in Serotonin 2C Receptor mRNA. *PLoS Comput Biol* 8(9): e1002663. doi:10.1371/journal.pcbi.1002663

**Editor:** Scott Markel, Accelrys, United States of America

**Received:** November 20, 2011; **Accepted:** July 15, 2012; **Published:** September 6, 2012

This is an open-access article, free of all copyright, and may be freely reproduced, distributed, transmitted, modified, built upon, or otherwise used by anyone for any lawful purpose. The work is made available under the Creative Commons CC0 public domain dedication.

**Funding:** LC was supported by the European Union Marie Curie International Reintegration Grant (PIRG05-GA-2009-248639), and by the Lohenstein August and Elza Foundation. EVK is supported by the Intramural Program of the US Department of Health and Human Services (National Library of Medicine, NIH). SD is supported by VA Merit award, NIMH MH090352 grant, the Hope for Depression Foundation grant, and by the VISN3 Mental Illness Research and Education Clinical Center (MIRECC). The funders had no role in study design, data collection and analysis, decision to publish, or preparation of the manuscript.

**Competing Interests:** The authors have declared that no competing interests exist.

\* E-mail: Stella.Dracheva@mssm.edu

## Introduction

The serotonin receptor 2C (5-HT<sub>2C</sub>R) is widely distributed within the central nervous system [1,2], where it mediates diverse neurological processes that affect feeding behavior, sleep, sexual activity, anxiety and depression [reviewed in [3,4]]. The 5-HT<sub>2C</sub>R protein belongs to the G-protein-coupled receptor (GPCR) superfamily and potentiates multiple signal transduction pathways via several different G proteins (G<sub>αq</sub>/11, G<sub>α12</sub>/13 and G<sub>αi</sub>) to modulate effector molecules such as phospholipases C, D and A2, as well as the extracellular signal-regulated kinases 1 and 2 [reviewed in [5,6]].

The 5-HT<sub>2C</sub>R protein exhibits functional variability that is derived from editing of its pre-mRNA by site-specific adenosine deamination (A-to-I pre-mRNA editing) [6]. Editing of 5-HT<sub>2C</sub>R can produce inosine from adenine at up to five closely-spaced (within a 15 nucleotide segment) position that have been named A, B, E (also known as C'), C, and D sites. Because inosine is read as guanosine by the translational machinery, editing can alter codons for three amino acids in the second intracellular loop of the receptor [7,8], a region involved in coupling with G-proteins [9].

Combinatorial editing at the five positions can generate up to 32 mRNA variants encoding 24 different receptor isoforms (sites A and B as well as sites E and C are situated in the same codons). The extent of editing is inversely correlated with 5-HT<sub>2C</sub>R functional activity such that the more highly edited isoforms are less active than less extensively edited ones [reviewed in [6]]. The unedited Ile156-Asn158-Ile160 (INI) isoform possesses considerable constitutive and agonist-stimulated activity. In contrast, when the 5-HT<sub>2C</sub>R is edited, its coupling to G-proteins and its affinity for serotonin are drastically reduced. Specifically, experiments in heterologous expression systems have shown that, compared to the INI, the fully-edited Val156-Gly158-Val160 (VGV) 5HT<sub>2C</sub>R isoform (which is edited at all five editing sites) has a 40-fold decreased serotonergic capability to stimulate phosphoinositide hydrolysis due to reduced Gq/11-protein coupling efficiency and decreased coupling to other signaling pathways [7,10]. In addition, cells expressing more highly edited 5HT<sub>2C</sub>R isoforms such as VGV demonstrate considerably reduced (or absent) constitutive activity compared to cells expressing the non-edited INI isoform [10]. This reduction in coupling efficiency and constitutive activity derives from a difference in the ability of edited 5-HT<sub>2C</sub>R isoforms

## Author Summary

The serotonin receptor 2C is a key regulator of diverse neurological processes that affect feeding behavior, sleep, sexual behavior, anxiety and depression. The function of the receptor itself is regulated via so-called pre-mRNA editing, i.e. site-specific adenosine deamination in five distinct sites. The greater the number of edited sites in the serotonin receptor mRNA, the lower the activity of the receptor it encodes. Here we used the results of extensive massively parallel sequencing from human and rat brains to elucidate the dependencies among the editing states of the five sites. Despite the apparent simplicity of the problem, disambiguation of these dependencies is a difficult task that required development of a new statistical technique. We employed this method to analyse the dependencies among editing in the 5 susceptible sites of the receptor mRNA and found that the proximal, juxtaposed sites A and B are strongly interdependent, and that the editing state of these two sites is a major determinant of the editing states of the other three sites, and hence the overall editing pattern. The statistical approach we developed for the analysis of mRNA editing can be applied to other cases of multiple site modification in RNA and proteins.

to spontaneously isomerize to the active conformation ( $R^*$ ), a form of the receptor that efficiently interacts with G-proteins in the absence of agonist [11].

A-to-I editing is catalyzed by specific editing enzymes, RNA-specific adenosine deaminases ADAR1 and ADAR2 [reviewed in [12,13]]. A-to-I editing most frequently occurs in repetitive RNA sequences (e.g., Alu sequences) located within introns and 5' or 3' untranslated regions (UTRs). Although the biological significance of non-coding A-to-I RNA editing remains uncertain, the overall editing levels are higher in human compared to primate brains, thus suggesting a possible contribution of editing to the development of higher brain function [14–17]. Site-specific edited substrates have been identified in only a few transcripts, including 5-HT<sub>2C</sub>R mRNA, most of which are expressed in the central nervous system (CNS) and encode proteins involved in neurotransmission [6]. In these protein-coding transcripts, several adenosines are targeted within an imperfect RNA fold-back structure. The features that make RNA prone to site-specific editing are not fully understood, but it is thought that internal mismatches and bulges within double-stranded RNA (dsRNA) are important for the specificity of the ADARs [18–20].

Although the specificities of ADAR1 and ADAR2 toward different editing sites often overlap, some sites are edited entirely by one enzyme or the other, and the two enzymes display somewhat different preferences for nearest neighbors of the specific editing sites [19,21]. Experiments on mouse models with null mutations in one or both ADARs suggest that, within 5-HT<sub>2C</sub>R mRNA, the A site is predominantly edited by ADAR1 and the D site is mostly edited by ADAR2 [22–24]. The other sites have the potential to be edited by both ADAR1 and ADAR2. In addition, it has been proposed that there is crosstalk between ADAR1 and ADAR2, and therefore the relative expression of the different ADARs might ultimately influence the pattern of editing [reviewed in [6]]. The mechanism underlying the putative crosstalk is unclear, but because the five 5-HT<sub>2C</sub>R editing sites are closely spaced, editing at one site might lead to perturbation of the dsRNA structure that, in turn, would facilitate further editing at other site(s). Indeed, apparent interdependence of editing

among the sites has been previously reported for rodent brain [25,26].

Serotonin signaling, including 5-HT<sub>2C</sub>R, has been implicated in the etiology of behavioral and psychiatric disorders, and 5-HT<sub>2C</sub>R is considered an important target for pharmacologic intervention [4]. Several groups have recently reported an association between 5-HT<sub>2C</sub>R editing and suicide [27–31]. Specifically, our studies suggest that in the three major psychiatric diseases (schizophrenia, bipolar disorder, and major depression) that comprise ~75% of suicides, suicide is associated with enhanced levels of editing (and by inference, with lower activity) of 5-HT<sub>2C</sub>R in the prefrontal cortex independent of the contributions of the underlying disease [30,31]. The biological mechanisms that contribute to higher 5-HT<sub>2C</sub>R editing (and therefore, hypoactive receptors) in suicide compared to non-suicide psychiatric patients remain unclear. However, it seems likely that because enhanced editing decreases 5-HT<sub>2C</sub>R activity, the resulting reduction in the receptor function might predispose some individuals to suicide by altering 5-HT<sub>2C</sub>R-dependent signal transduction in critical brain regions. Thus, altered editing mechanisms might be linked to liability for suicide, and detailed understanding of these mechanisms could facilitate the development of unique pharmacological strategies that target suicidal behavior.

Alteration of the 5HT<sub>2C</sub>R function via editing has also been reported in response to spinal cord injury (SCI) in rats [32]. Muscle paralysis after SCI is partly caused by a loss of all brainstem-derived neurotransmitters (including serotonin), which normally modulate motoneuron excitability. Murray et al. examined how motoneurons in the spinal cord of the SCI rats compensated for lost brain-derived neurotransmitters to regain excitability and found that changes in 5-HT<sub>2C</sub>R mRNA editing led to increased expression of the 5-HT<sub>2C</sub>R isoforms that are active without serotonin [32]. Such constitutive receptor activity restored excitability of the motoneurons in the SCI rats in the absence of serotonin, helping motoneurons recover their ability to produce sustained tail muscle contractions. Accordingly, blocking constitutively active 5-HT<sub>2C</sub>R with specific drugs (SB206553 or cyproheptadine) largely eliminated these calcium currents and muscle spasms, providing a new rationale for antispastic drug therapy.

Recently, we applied the Massively Parallel Sequencing (MPS) technology to quantify 5-HT<sub>2C</sub>R editing in the postmortem human brain and the rat spinal cord specimens [31,33]. The traditional cloning and sequencing approach [7,34] relies on sampling a limited population of cloned transcripts (~20–100), thus producing significant sampling errors that can obscure differences between experimental groups. The use of MPS, which analyzes several hundred thousand 5-HT<sub>2C</sub>R transcripts per specimen, not only allowed us to detect all 32 mRNA variants of 5-HT<sub>2C</sub>R in both species, but substantially increased precision and sensitivity in measuring 5-HT<sub>2C</sub>R editing frequencies for all these mRNA variants. Specifically, a comparison between MPS (over 730,000 reads per subject) and the traditional method (46 clones per subject), performed for the same human subjects and the same brain region, has shown that the mean coefficient of variation of the editing frequencies of all variants in the NGS analysis was approximately one-third that of the traditional method [31].

Here we use the MPS data generated in these recent studies on 5-HT<sub>2C</sub>R editing in the human and rat CNS specimens to comprehensively characterize the dependencies among the 5 different editing sites in the 5-HT<sub>2C</sub>R mRNA. The extremely high number of sequenced transcripts combined with the use of a newly developed rigorous statistical procedure allowed us to elucidate the fine structure of these interactions and compare them between the two species as well as among individuals.

## Results

### Massively parallel sequencing data

5-HT<sub>2C</sub>R mRNA editing was measured in the specimens obtained from the human dorsolateral prefrontal cortex and rat spinal cord. The 101 human subjects comprised 45 individuals diagnosed with major depression, and 56 normal controls [31]. The 19 rats comprised 7 controls and 12 rats whose spinal cord was transacted six weeks prior to the data collection [33]. In these rat specimens, the mRNA levels are assumed to be unaffected by the transaction, being collected from a region above it. Overall, the analysed data included 56,690,398 human reads (an average of 561,291 per subject) and 5,659,108 rat reads (an average of 297,848 per rat) (Supplementary Table S1).

Each measurement (mRNA molecule) is represented by a binary vector indicating the editing states of the five sites A, B, E, C, and D. For example, a measurement in which sites A, B, and D are edited but E and C are not is represented by the binary pattern 11001. For a collection of measurements, we denote the *editing pattern* as the vector  $(t_0, t_1, \dots, t_{31})$ , where  $t_i$  is the number of binary vectors whose decimal representation is  $i$ .

First, we tested whether the editing patterns of all human normal controls were statistically indistinguishable from the editing patterns of all subjects with major depression. To this end, we conducted a conservative randomization test, whereby the  $\chi^2$ -test statistic was repeatedly computed on modified data. In each repetition, we randomly assigned subjects as normal or as depressed, keeping the total number of normal controls and the total number of subjects with major depression fixed. For each repetition, we computed the test statistic of the  $\chi^2$ -test,

$$\sum_{i=0}^{31} \frac{\left[ \sqrt{\frac{n_c}{n_d}} t_i^d - \sqrt{\frac{n_d}{n_c}} t_i^c \right]^2}{t_i^d + t_i^c}$$

where  $t^c$  and  $t^d$  are the editing patterns of normal and depressed samples, respectively, and  $n_c$  and  $n_d$  are the total number of measurements from normal controls and from subjects with major depression, respectively. This procedure was repeated  $10^6$  times, and the p-value of the test was computed as the number of random test statistics that were larger than the true test statistic. A similar procedure was used to compare normal rats with transacted ones. We found that the editing pattern in normal human controls was

indistinguishable from the editing pattern in subjects with major depression ( $P=0.80$ ), and that the editing pattern in normal rats was indistinguishable from that in transacted rats ( $P=0.65$ ). This result justifies pooling together all human subjects and all rats for further analysis. Using a similar randomization procedure, we found that the editing pattern in humans is very different from that in rats ( $P<10^{-6}$ ) (Supplementary Figure S1).

### Hierarchical clustering of editing sites

Next, we tested for each pair of sites whether their editing patterns were correlated. To this end, we computed the  $\phi$ -coefficient (which, for binary data, is simply the correlation coefficient; see Methods), and found that all pairs of sites are correlated, either positively or negatively, except for the pair (D,E) in human, and the pair (A,E) in rat (Supplementary Table S2).

In order to obtain more detail on the level of dependence between different sites, we followed Ensterö *et al.* [26] and clustered the editing sites (Figure 1). We used the Jaccard distance coupled to single linkage hierarchical clustering (see Methods), but using Dice distance following Ensterö *et al.* [26] had no significant effect on the clustering (Supplementary Figure S2). In order to assign confidence level to the clusters, we repeated the clustering for each individual and measured the fraction of cases in which the cluster was supported (see Methods). In both human and rat the strongest association was observed to exist between sites A and B, to which site D joins next. Sites C and E were more weakly associated with the rest of the editing sites, at least in human, and the order by which they join the dendrogram changed from human to rat.

### Finding the probability model with the best fit to the data

Clustering, by nature, identifies groups of associated sites. However, to obtain finer resolution of the relationship between the sites, we resorted to more elaborate methods. The ultimate description of the dependency between the editing sites would be their joint probability distribution. For five editing sites, there are 8,782 possible joint distribution functions. We enumerated all the 8,782 functions, and ranked them according to how well they fit the data using both maximum-likelihood and Bayesian inference (see Methods).

In both human and rat, and for both maximum-likelihood and Bayesian inference, the best model was the maximally-dependent

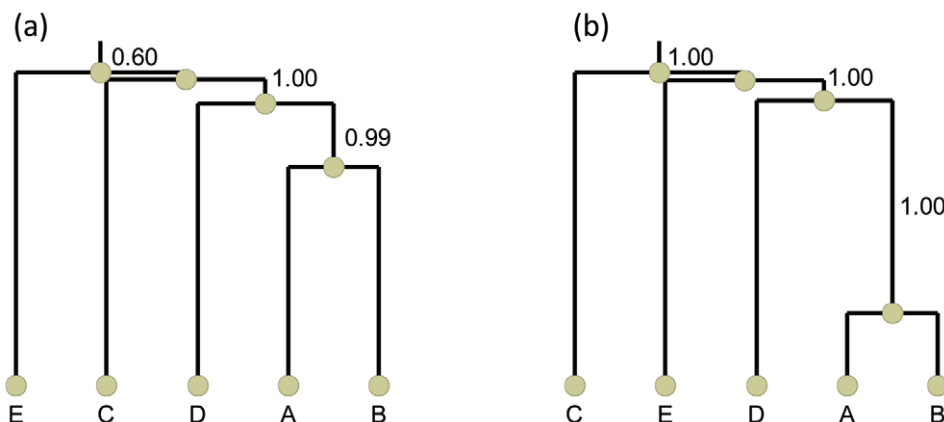

**Figure 1. Clustering of the five editing sites using Jaccard distance in (a) human and (b) rat.** Each edge is assigned with a confidence level according to the fraction of times by which it was supported by the different individuals.  
doi:10.1371/journal.pcbi.1002663.g001

joint probability distribution,  $P(A,B,E,C,D) = P(A) \cdot P(B|A) \cdot P(E|A,B) \cdot P(C|A,B,E) \cdot P(D|A,B,E,C)$ . We graphically represent probability models by a pDAG (partial Directed Acyclic Graph), which is a Bayesian network containing a mixture of directed and undirected edges (see Methods). The pDAG of this maximally-dependent model is simply the fully connected undirected graph (Figures 2, 3). This result is consistent with our previous finding that all pairs of sites are significantly dependent.

Such result is expected given the large size of the data. In order to find which edges in the graph are more strongly supported by the data, we divided all the 8,782 probability models into 11 groups according to the number of edges in the corresponding pDAG. The first group consists of all models with zero edges (which is simply the single model  $P(A) \cdot P(B) \cdot P(E) \cdot P(C) \cdot P(D)$ ), the second group consists of all (ten) models with one edge, etc. Then, we computed the best-fitting probabilistic model within each group. Hereinafter,  $M_e$  denotes the best-fitting model from within the group of models with  $e$  edges. The results for the maximum-likelihood Bayesian Information Criterion (BIC) score (see Methods) in human are shown in Figure 2. Adding an edge to a model always improves its score,  $\text{BIC}(M_{e+1}) < \text{BIC}(M_e)$ , but the improvement becomes smaller as  $e$  increases. The estimated

parameters of each of the best-fitting models are given in Supplementary Table S3.

To further explore the relative impact of the different edges, we ranked the edges by the order in which they first appear in the sequence of models  $M_1, M_2, \dots, M_{10}$ . Specifically, the rank of an edge is the smallest integer  $r$  for which  $M_r$  contains this edge (Table 1). Importantly, an edge in  $M_e$  need not necessarily be included in  $M_{e+1}$ , which is the reason why two edges – (B,E) and (E,C) – have the same rank, and why no new edge appeared in  $M_8$ . To account for the possibility that edges may disappear or reappear as the number of edges grows, we define for each edge its *support*. The support of an edge with rank  $r$  is the fraction of the models  $M_r, M_{r+1}, \dots, M_{10}$  that contain this edge (Table 1). Clearly, the higher the support, the more confident we are that the edge has a unique contribution to making the respective model better fitting the data. The edge (A,B) is the first to appear ( $r=1$ ), and has a full support (it appears in all the models  $M_1$  through  $M_{10}$ ), indicating that the dependence between A and B is obviously the strongest among all pairs of sites, in accord with the findings described above. Next appear edges (B,D) and (A,C) that both also have full support. This observation is consistent with the clustering analysis results (Figure 1) but provides more detail

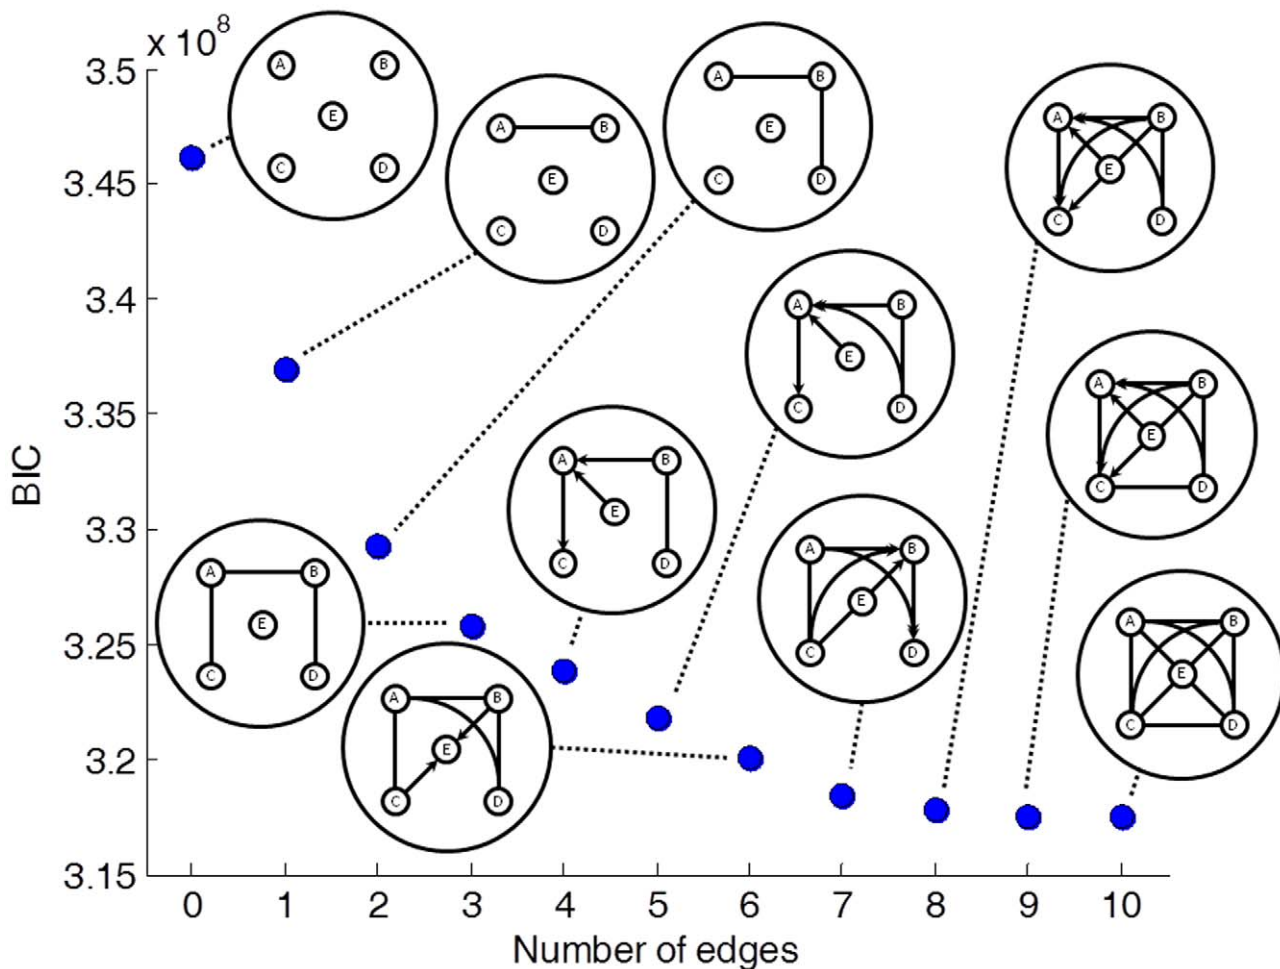

**Figure 2. BIC scores (dots) and pDAGs of human models  $M_1$  through  $M_{10}$ .** The BIC scores of the models  $M_1, M_2, \dots, M_{10}$  are shown as dots, and the pDAGs of the models themselves are plotted next to each dot. These models represent relationship between sites rather than true causality, as indicated by the fact that some edges reverse their direction in different models. The number of parameters required to describe each of the models is 5 ( $M_0$ ), 6 ( $M_1$ ), 7 ( $M_2$ ), 8 ( $M_3$ ), 10 ( $M_4$ ), 14 ( $M_5$ ), 13 ( $M_6$ ), 17 ( $M_7$ ), 21 ( $M_8$ ), 29 ( $M_9$ ), and 31 ( $M_{10}$ ). doi:10.1371/journal.pcbi.1002663.g002

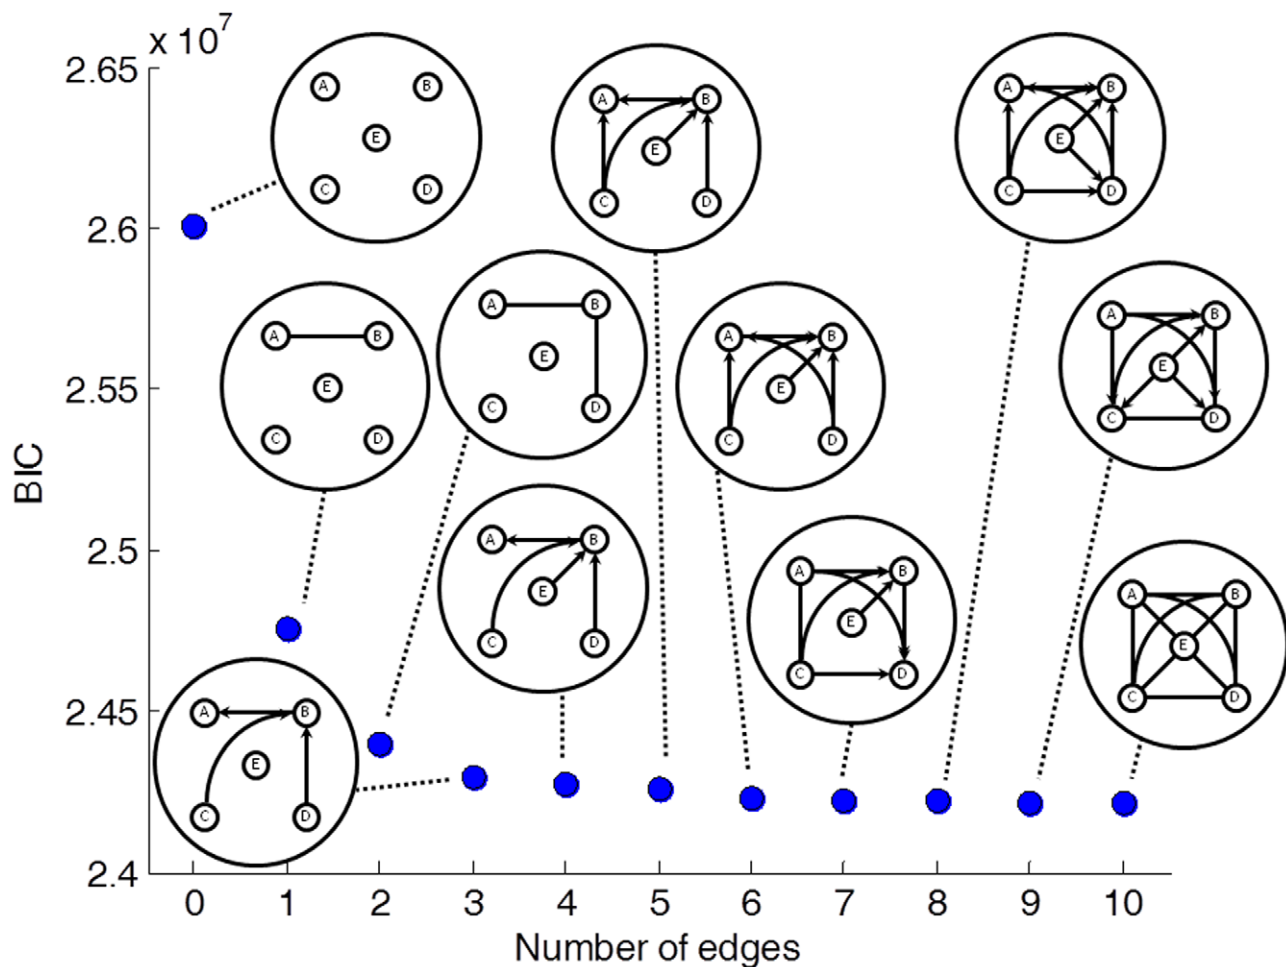

**Figure 3. BIC scores (dots) and pDAGs of rat models  $M_1$  through  $M_{10}$ .** The designations are as in Figure 2. The number of parameters required to describe each of the models is 5 ( $M_0$ ), 6 ( $M_1$ ), 7 ( $M_2$ ), 9 ( $M_3$ ), 13 ( $M_4$ ), 15 ( $M_5$ ), 23 ( $M_6$ ), 20 ( $M_7$ ), 26 ( $M_8$ ), 30 ( $M_9$ ), and 31 ( $M_{10}$ ). doi:10.1371/journal.pcbi.1002663.g003

on the interdependencies among A, B, and C, D. The next edge to appear is (A,E), but it does not have full support which lowers our confidence in its unique contribution to the score of the best model. The edges that appear in models  $M_9$  and  $M_{10}$  – (C,D) and (E,D) – make (at least qualitatively) only marginal contributions to the score. Repeating the analysis with the maximum-likelihood Akaike Information Criterion (AIC) scores, or with Bayesian scores, gave the same series of best-fitting models  $M_1$  to  $M_{10}$  (Supplementary Figure S3).

We conducted the same analysis for the rat data. Here, too, adding edges kept improving the BIC score of the model (Figure 3). The estimated parameters of the best-fitting models are given in Supplementary Table S4. For rat, all edges have full support, which means that an edge with rank  $r$  appears in all the models  $M_r$  to  $M_{10}$  (Table 2). In rat, the two edges with the lowest rank – (A,B) and (B,D) – have the same rank as in human. However, the edge with  $r=3$  in rat is (B,C) as opposed to (A,C) in the equivalent human  $M_3$  model. Similarly, the edge with  $r=4$  is (A,E) in human, but it is (B,E) in rat. This suggests that the central role of site A in governing the editing state of sites E, C, and D in human is taken by site B in rat. Indeed, referring collectively to site A or site B as F, human and rat show very similar edge rankings (compare Tables 1 and 2). Repeating the analysis with Bayes scores yielded identical series of best-fitting models for rat

**Table 1. Ranking of the strength of dependency of each pair of editing sites in human 5-HT<sub>2C</sub>R mRNA.**

| rank | Edge  | Edge (A,B as F) | Support | Models supporting |
|------|-------|-----------------|---------|-------------------|
| 1    | (A,B) |                 | 10/10   | 1–10              |
| 2    | (B,D) | (F,D)           | 9/9     | 2–10              |
| 3    | (A,C) | (F,C)           | 8/8     | 3–10              |
| 4    | (A,E) | (F,E)           | 5/7     | 4,5,8,9,10        |
| 5    | (A,D) |                 | 6/6     | 5–10              |
| 6    | (B,E) |                 | 5/5     | 6–10              |
|      | (E,C) | (E,C)           | 5/5     | 6–10              |
| 7    | (B,C) |                 | 4/4     | 7–10              |
| 9    | (C,D) | (C,D)           | 2/2     | 9–10              |
| 10   | (E,D) | (E,D)           | 1/1     | 10                |

The lower the rank of an edge, and the higher its support, the stronger is the dependency between the pair of editing sites (see text for details). The third column is the same as the second column, except that either A or B are marked as F. The rightmost column lists the models in which the given edge appears. doi:10.1371/journal.pcbi.1002663.t001

**Table 2.** Ranking of the strength of dependence of each pair of editing sites in rat 5-HT<sub>2C</sub>R mRNA.

| Rank | Edge  | Edge (A,B as F) | Support | Models supporting |
|------|-------|-----------------|---------|-------------------|
| 1    | (A,B) |                 | 10/10   | 1–10              |
| 2    | (B,D) | (F,D)           | 9/9     | 2–10              |
| 3    | (B,C) | (F,C)           | 8/8     | 3–10              |
| 4    | (B,E) | (F,E)           | 7/7     | 4–10              |
| 5    | (A,C) |                 | 6/6     | 5–10              |
| 6    | (A,D) |                 | 5/5     | 6–10              |
| 7    | (C,D) | (C,D)           | 4/4     | 7–10              |
| 8    | (E,D) | (E,D)           | 3/3     | 8–10              |
| 9    | (E,C) | (E,C)           | 2/2     | 9–10              |
| 10   | (A,E) |                 | 1/1     | 10                |

The lower the rank of an edge, and the higher its support, the stronger is the dependence between the pair of editing sites (see text for details). The third column is the same as the second column, except that either A or B are marked as F. The rightmost column lists the models in which this edge appears.

doi:10.1371/journal.pcbi.1002663.t002

(Supplementary Figure S4b). Using AIC scores produced only a single difference, in model  $M_8$ . The edge (C,D), which is present in the BIC and Bayes scores, was replaced by the edge (E,C) for the AIC score (Supplementary Figures S4a and S5). However, as we have seen, these edges anyway have marginal contribution to the best-fitting model. On the whole, the information contribution of additional edges dropped much faster for the rat data than it did for the human data (compare Figures 2 and 3), suggestive of a more complex pattern of dependencies among editing sites and accordingly more subtle regulation of the editing process in human brain.

The above analysis lacks measure of score variance, thus hindering quantitative evaluation of the significance of each edge to the total score. To overcome this, we repeated the analysis for each individual separately, for both human and rat. In this way, each individual  $i$  provides its own sequence of best fitting models  $M_{i1}, M_{i2}, \dots, M_{i,10}$ , and for each number of edges  $e$  ( $e=0, \dots, 10$ ), there is now a sequence  $M_{1e}, M_{2e}, \dots, M_{ne}$  of best models, where  $n$  is the total number of individuals. For a certain  $e$ , let  $n$  individuals support  $P$  different best-models,  $M_1^e, M_2^e, \dots, M_P^e$ , such that  $M_P^e$  is supported by  $n_P$  individuals. Let us further assume that we have sorted the sequence  $M_1^e, M_2^e, \dots, M_P^e$  according to the level of support, such that  $n_1 \geq n_2 \geq \dots \geq n_P$ . Next, we define a set  $(M_1^e, M_2^e, \dots, M_S^e)$  of  $S$  models that are equally supported by the different individuals ( $S \leq P$ ). To this end we make a Bonferroni-corrected series of proportion tests, asking whether  $M_1^e$  is supported significantly more than the other best-fitting models  $M_2^e, \dots, M_P^e$ .  $M_{S+1}^e$  is the first model whose support is significantly lower than that of  $M_1^e$ . The results for the BIC scores in human at significance level 0.05 are given in Table 3. The results for the AIC and Bayes scores are similar, and are given in Supplementary Tables S5 and S6. As an example, in the BIC score analysis, out of 101 individuals 78 (77.2%) support the single-edge best-fitting model (A→B) (Table 3). The second-supported model  $M_2^1$  is supported by 21 individuals (20.8%), which is significantly lower than the support for  $M_1^1$  and so in this case  $S=1$  and the set of best fitting models is simply  $(M_1^1)$ . As another example,  $M_1^8$  is supported by 14 individuals (13.9%), but this level of support is not statistically different from the support by 3 individuals (3.0%) of

the model  $M_{12}^8$ , and in this case  $S=12$ . Overall, there is a good agreement between this individual-based analysis and the pooled analysis. The pooled best-fitting model for each  $e$  is marked by asterisk in Table 3 and Supplementary Tables S5 and S6, and it is always within the group of models that are equally supported by the different individuals. Very similar results had been obtained for rat (Supplementary Tables S7, S8, S9). Here too, the pooled best-fitting model for each  $e$  is always within the group of models that are equally supported by the different individuals.

The individual-based approach can be used not only to re-evaluate the support for the different graphical models but also to perform an edge-by-edge analysis. To this end, we can look at each edge, and count how many times (in either direction) it appears in the sequence  $M_{1e}, M_{2e}, \dots, M_{ne}$ . These counts are binomial random variables, so if an edge appears, overall, in the best-fitting model of  $x$  individuals out of a total of  $n$  individuals, its variance is  $n \cdot (x/n) \cdot (1-x/n) = x(1-x/n)$ . The support of each edge for any  $e$  in human is given in Figure 4. Consider, for example,  $e=4$ . Overall, the 101 individuals support  $P=20$  different best-fitting models. Yet, the edge (A,B) appears in all of them, and thus is supported by all the individuals. The edge (B,D) is supported by 98 individuals, or by 97% of the best-fitting models. For each  $e$ , we can take the first  $e$  most-supported edges as the *basic set* of edges in the  $M_e$  model. Then, we can check how unique is this set of edges by testing (using proportion test) whether the  $e$ 'th supported edge is significantly more supported than the next edges (Table 4). From Table 4 and Figure 4 we see that the first three edges (A,B), (B,D), and (A,C) are clearly more supported than all other edges, in this order. However, the next edges (B,E), (E,C), and (A,D) all have approximately the same support and no one is more significant than the others. The results are almost identical when using AIC or Bayes scores (Supplementary Figures S6 and S7).

Similar analysis for rat shows, in accord with our previous results, a more hierarchical relationship between the edges (Figure 5 and Table 5). Here, the order of importance is clear for the first six edges: (A,B), (B,D), (B,C), (B,E), (A,C), and (A,D). The edges (C,D), (E,D), and (E,C) all have approximately the same support and no one is more significant than the others. The results are almost identical when using AIC or Bayes scores (Supplementary Figures S8 and S9).

## Discussion

Here we analysed interdependencies among editing sites within mRNA of 5-HT<sub>2C</sub>R. The studies were performed using available data sets for the human dorsolateral prefrontal cortex and rat spinal cord tissues. Alterations in 5-HT<sub>2C</sub>R editing in these particular species and CNS regions were reported in connection to completed suicide and in response to SCI, respectively [30–32]. Thus, detailed understanding of editing mechanisms in these particular areas of the human and mouse CNS are expected to aid in the development of unique pharmacological strategies that target suicidal behavior as well as SCI-related spasticity.

The dependencies among editing sites described here allow us to propose a hypothetical mechanistic model for the concerted action of ADAR1 and ADAR2 in 5-HT<sub>2C</sub>R editing. Given that the dependence between sites A and B was by far the strongest revealed (see Figures 1–5) and that these sites are adjacent in 5-HT<sub>2C</sub>R mRNA, we speculate that ADAR1 that is known to be responsible for editing at A [22] also edits B. Moreover, the strong connection between sites A and B mechanistically might stem from editing of both sites by the same ADAR1 molecule without dissociation of the enzyme from the mRNA (Figure 6). Given that

**Table 3.** Statistics on the individual best-models for BIC scores in human.

| No. of edges | Model (rank) | Support    | Model (edges)                                    |
|--------------|--------------|------------|--------------------------------------------------|
| 0            | (*) 0        | 101 (100%) |                                                  |
| 1            | (*) 1        | 78 (77.2%) | A→B                                              |
| 2            | (*) 153      | 92 (91.1%) | B→A, D→B                                         |
| 3            | (*) 833      | 58 (57.4%) | A→B, A→C, B→D                                    |
| 4            | 2584         | 24 (23.8%) | A→B, B→D, E→B, C→A                               |
|              | (*) 3204     | 19 (18.8%) | A→C, B→A, E→A, D→B                               |
|              | 8335         | 19 (18.8%) | A→B, A→C, B→D, C→E                               |
|              | 9752         | 12 (11.9%) | A→B, A→C, A→D, D→B                               |
| 5            | 8342         | 17 (16.8%) | A→B, B→E, A→C, B→D, C→E                          |
|              | (*) 3490     | 15 (14.9%) | A→C, B→A, E→A, D→A, D→B                          |
|              | 9186         | 10 (9.9%)  | A→B, A→C, B→D, E→B, C→E                          |
|              | 9836         | 10 (9.9%)  | A→B, A→C, A→D, C→E, D→B                          |
|              | 2870         | 9 (8.9%)   | A→B, B→D, E→B, C→A, C→B                          |
|              | 2596         | 8 (7.9%)   | A→B, A→D, B→D, E→B, C→A                          |
|              | 180          | 6 (5.9%)   | B→A, E→A, C→A, D→A, D→B                          |
|              | 3210         | 5 (5.0%)   | A→C, E→C, B→A, E→A, D→B                          |
| 6            | (*)10138     | 21 (20.8%) | A→B, B→E, A→C, A→D, C→E, D→B                     |
|              | 9198         | 12 (11.9%) | A→B, A→C, A→D, B→D, E→B, C→E                     |
|              | 8356         | 11 (10.9%) | A→B, A→E, B→E, A→C, B→D, C→E                     |
|              | 2882         | 10 (9.9%)  | A→B, A→D, B→D, E→B, C→A, C→B                     |
|              | 3496         | 8 (7.9%)   | A→C, E→C, B→A, E→A, D→A, D→B                     |
|              | 1986         | 7 (6.9%)   | E→C, B→A, E→A, C→A, D→A, D→B                     |
| 7            | 10152        | 28 (27.7%) | A→B, A→E, B→E, A→C, A→D, C→E, D→B                |
|              | (*) 9298     | 18 (17.8%) | A→B, A→C, A→D, B→D, E→B, C→B, C→E                |
| 8            | 13976        | 14 (13.9%) | B→E, B→D, B→A, E→A, C→A, C→E, D→A, D→C           |
|              | (*) 14620    | 12 (11.9%) | B→E, A→C, B→C, E→C, B→D, B→A, E→A, D→A           |
|              | 7012         | 11 (10.9%) | A→B, A→C, E→C, E→A, E→B, C→B, D→A, D→B           |
|              | 3511         | 9 (8.9%)   | A→C, B→C, E→C, B→A, E→A, D→A, D→B, D→C           |
|              | 10159        | 8 (7.9%)   | A→B, A→E, B→E, A→C, A→D, C→E, D→B, D→E           |
|              | 7108         | 7 (6.9%)   | A→B, A→C, B→C, E→C, E→A, E→B, D→A, D→B           |
|              | 10300        | 7 (6.9%)   | A→B, A→E, B→E, A→C, A→D, C→B, C→E, D→B           |
|              | 14448        | 4 (4.0%)   | B→E, B→C, E→C, B→D, B→A, E→A, C→A, D→A           |
|              | 5812         | 3 (3.0%)   | A→E, B→E, A→D, B→D, B→A, C→A, C→E, D→E           |
|              | 6959         | 3 (3.0%)   | A→B, E→C, E→B, C→A, C→B, D→A, D→B, D→C           |
|              | 7036         | 3 (3.0%)   | B→C, E→C, B→A, E→A, E→B, C→A, D→A, D→B           |
|              | 9208         | 3 (3.0%)   | A→B, A→C, A→D, E→D, E→B, C→B, C→E, D→B           |
| 9            | (*)14623     | 31 (30.7%) | B→E, A→C, B→C, E→C, B→D, B→A, E→A, D→A, D→C      |
|              | 10303        | 27 (26.7%) | A→B, A→E, B→E, A→C, A→D, C→B, C→E, D→B, D→E      |
|              | 7111         | 25 (24.8%) | A→B, A→C, B→C, E→C, E→A, E→B, D→A, D→B, D→C      |
| 10           | (*) 10655    | 101 (100%) | A→B, A→E, B→E, A→C, B→C, E→C, A→D, B→D, E→D, C→D |

For each family of models with the same number of edges, we report all significantly enriched best-models found among all 101 individuals. The ID of the model is its rank (asterisk marks the best model found in the pooled analysis, see Figure 2). The support is the number of individuals that gave this model as the best-fit model. doi:10.1371/journal.pcbi.1002663.t003

site D, known to be edited by ADAR2 [22], is next after sites A and B in terms of the strength of the dependency, followed by site C, we further speculate that editing of sites A and B by ADAR1 affects the RNA structure such that binding of ADAR2 followed by editing at site D and possibly the two remaining sites is enhanced (Figure 6). A more far reaching implication is that the apparent primary role of ADAR1 in 5-HT<sub>2C</sub>R editing makes it the

most attractive target for pharmacological intervention in the associated psychiatric disorders. It is worth noting that such intervention would not interfere with the essential editing of the GluR2 subunit of the AMPA receptor that is primarily dependent on ADAR2 [35].

The results reported here show that for both human and rat 5-HT<sub>2C</sub>R, the editing states of the physically proximal sites A and B

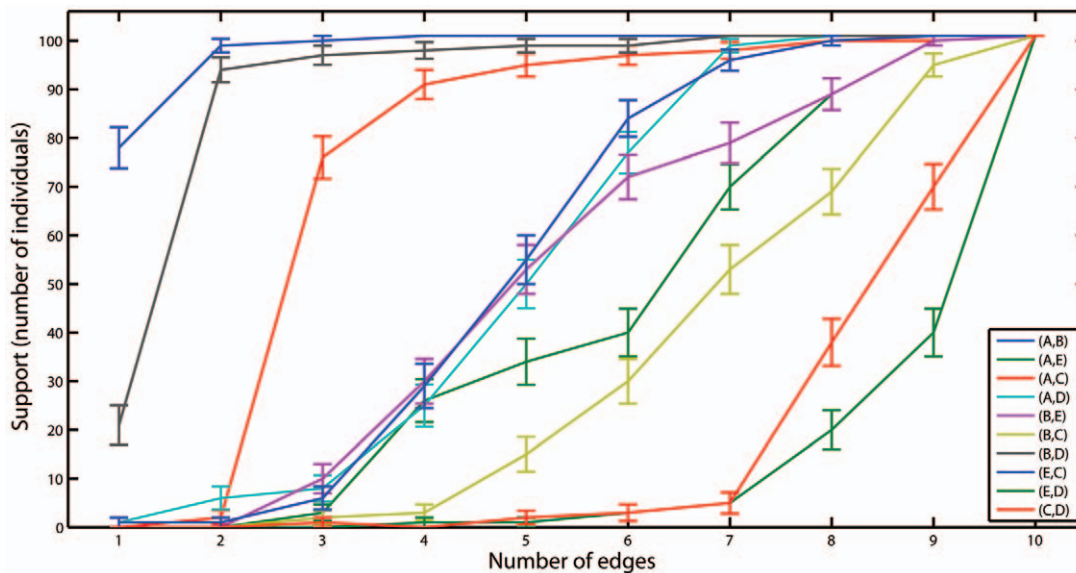

**Figure 4. Level of support of each edge in all individual best-fitting models with fixed number of edges.** The results are for BIC scores in human.

doi:10.1371/journal.pcbi.1002663.g004

are highly dependent. In contrast, the editing states of sites C and D, which are also physically close, seem not to be directly dependent, but rather indirectly linked through the dependencies of C and D on sites A and B, respectively. The results also reveal pronounced differences between the editing patterns in humans and rats: in humans site A has the key role in determining the editing state of the other sites whereas in rats this role belongs to site B. Although not detected by the simple analysis of the dependencies among the editing sites, computing the best-fitting probabilistic models shows that the editing state of site E is strongly dependent on the state of site A in human and on the state of site B in rat (Tables 1 and 2). Furthermore, the structure of the dependences between the editing sites is simpler in rats than it is in human implying more complex regulation of 5-HT<sub>2C</sub>R editing and by inference function in human brain. Mechanistically, the differences between the emerging patterns of editing regulation in humans and rats could be underpinned by the notable differences in the predicted secondary structures of the respective pre-mRNA regions [6].

To conclude, the results of the exhaustive analysis of 5-HT<sub>2C</sub>R editing patterns described here indicate that sites A and B strongly depend on each other in both human and rat, and that the editing state of these two sites is a key determinant of the editing state of the other three sites, and hence the overall editing pattern. The direct dependencies among the editing states of sites E, C, and D are much weaker, and the observed dependencies are probably an indirect effect of the dependency of those three sites on editing in sites A and B. Taken together, these findings allowed us to propose a mechanistic model of concerted action of ADAR1 and ADAR2 in 5-HT<sub>2C</sub>R editing. Methods of statistical inference developed here can be applied to other cases of interdependencies among multiple modification sites in RNA and proteins.

## Methods

The editing state of the five editing sites (A,B,E,C,D) in a single mRNA molecule is represented by a 5-digit binary vector, with

**Table 4. Edges present in the best-fitting models in human (BIC scores).**

| Number of edges | Number of unique best-fitting models ( <i>P</i> ) | Basic set of edges                                                   | Additional edges    |
|-----------------|---------------------------------------------------|----------------------------------------------------------------------|---------------------|
| 1               | 4                                                 | (A,B)                                                                |                     |
| 2               | 5                                                 | (A,B), (B,D)                                                         |                     |
| 3               | 13                                                | (A,B), (B,D), (A,C)                                                  |                     |
| 4               | 20                                                | (A,B), (B,D), (A,C), (B,E)                                           | (E,C), (A,E), (A,D) |
| 5               | 22                                                | (A,B), (B,D), (A,C), (B,E), (E,C)                                    | (A,D)               |
| 6               | 25                                                | (A,B), (B,D), (A,C), (B,E), (E,C), (A,D)                             |                     |
| 7               | 20                                                | (A,B), (B,D), (A,C), (B,E), (E,C), (A,D), (A,E)                      |                     |
| 8               | 26                                                | (A,B), (B,D), (A,C), (B,E), (E,C), (A,D), (A,E), (B,C)               |                     |
| 9               | 15                                                | (A,B), (B,D), (A,C), (B,E), (E,C), (A,D), (A,E), (B,C), (C,D)        |                     |
| 10              | 1                                                 | (A,B), (B,D), (A,C), (B,E), (E,C), (A,D), (A,E), (B,C), (C,D), (E,D) |                     |

For each fixed number of edges *e*, we report the basic set of edges (the most supported *e* edges), as well as additional edges that are not significantly less supported (at Bonferroni-corrected significance level 0.05).

doi:10.1371/journal.pcbi.1002663.t004

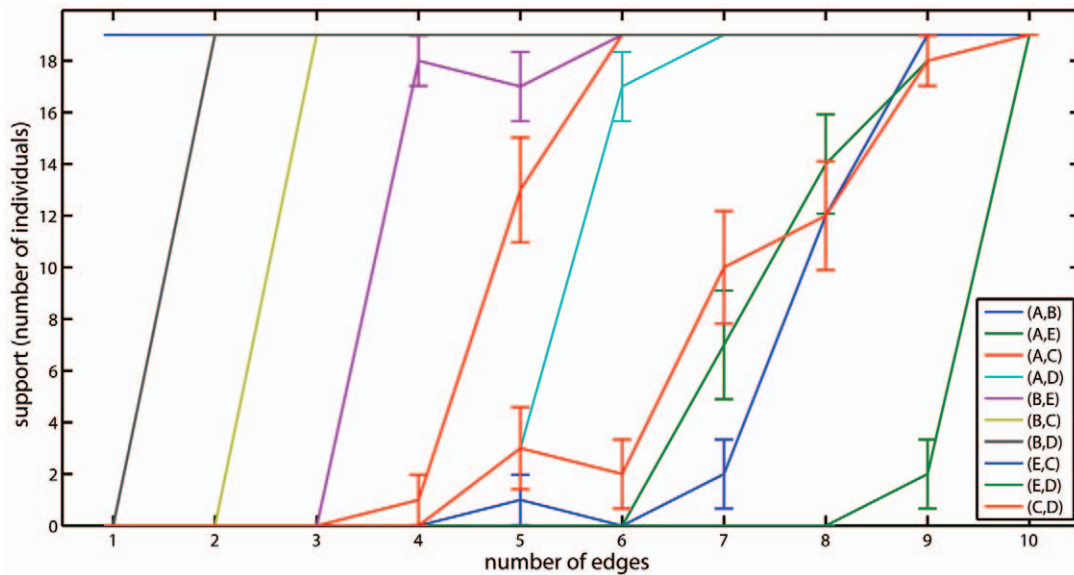

**Figure 5. Level of support of each edge in all individual best-fitting models with fixed number of edges.** The results are for BIC scores in rat.

doi:10.1371/journal.pcbi.1002663.g005

one designating an edited site and zero designating an unedited site. The data comprise measurements of the editing state of all five editing sites in  $n$  mRNA molecules.

#### Statistical test for pairwise correlation between editing sites

We tested whether the editing state of a pair of sites  $X$  and  $Y$  is correlated by computing the contingency table

|       | $Y=0$         | $Y=1$         | total        |
|-------|---------------|---------------|--------------|
| $X=0$ | $n_{00}$      | $n_{01}$      | $n_{0\cdot}$ |
| $X=1$ | $n_{10}$      | $n_{11}$      | $n_{1\cdot}$ |
| total | $n_{\cdot 0}$ | $n_{\cdot 1}$ |              |

for each individual, where  $n_{ij}$  is the number of mRNA molecules in which  $X=i$  and  $Y=j$  ( $i,j=0,1$ ) in that individual. Then, the

$\phi$ -coefficient was computed.

$$\phi = \frac{n_{00}n_{11} - n_{10}n_{01}}{\sqrt{n_{0\cdot}n_{1\cdot}n_{\cdot 0}n_{\cdot 1}}}.$$

This computation was repeated for all possible pairs in all individuals. Grouping the values from all individuals, the mean and standard deviation were computed for the  $\phi$ -coefficient for each pair of sites, and the z-test was used to test for significance.

#### Clustering of the editing sites

We defined the distance between sites  $X$  and  $Y$  as the Jaccard distance between their binary patterns,

$$J_{XY} = \frac{n_{01} + n_{10}}{n_{01} + n_{10} + n_{11}}.$$

**Table 5. Edges present in the best-fitting models in rat (BIC scores).**

| Number of edges | Number of unique best-fitting models ( $P$ ) | Basic set of edges                                                   | Additional edges |
|-----------------|----------------------------------------------|----------------------------------------------------------------------|------------------|
| 1               | 1                                            | (A,B)                                                                |                  |
| 2               | 1                                            | (A,B), (B,D)                                                         |                  |
| 3               | 1                                            | (A,B), (B,D), (B,C)                                                  |                  |
| 4               | 2                                            | (A,B), (B,D), (B,C), (B,E)                                           |                  |
| 5               | 6                                            | (A,B), (B,D), (B,C), (B,E), (A,C)                                    |                  |
| 6               | 2                                            | (A,B), (B,D), (B,C), (B,E), (A,C), (A,D)                             |                  |
| 7               | 3                                            | (A,B), (B,D), (B,C), (B,E), (A,C), (A,D), (C,D)                      | (E,D)            |
| 8               | 9                                            | (A,B), (B,D), (B,C), (B,E), (A,C), (A,D), (E,D), (E,C)               | (C,D)            |
| 9               | 7                                            | (A,B), (B,D), (B,C), (B,E), (A,C), (A,D), (E,D), (E,C), (C,D)        |                  |
| 10              | 1                                            | (A,B), (B,D), (B,C), (B,E), (A,C), (A,D), (E,D), (E,C), (C,D), (E,D) |                  |

For each fixed number of edges  $e$ , we report the basic set of edges (the most supported  $e$  edges), as well as additional edges that are not significantly less supported (at Bonferroni-corrected significance level 0.05).

doi:10.1371/journal.pcbi.1002663.t005

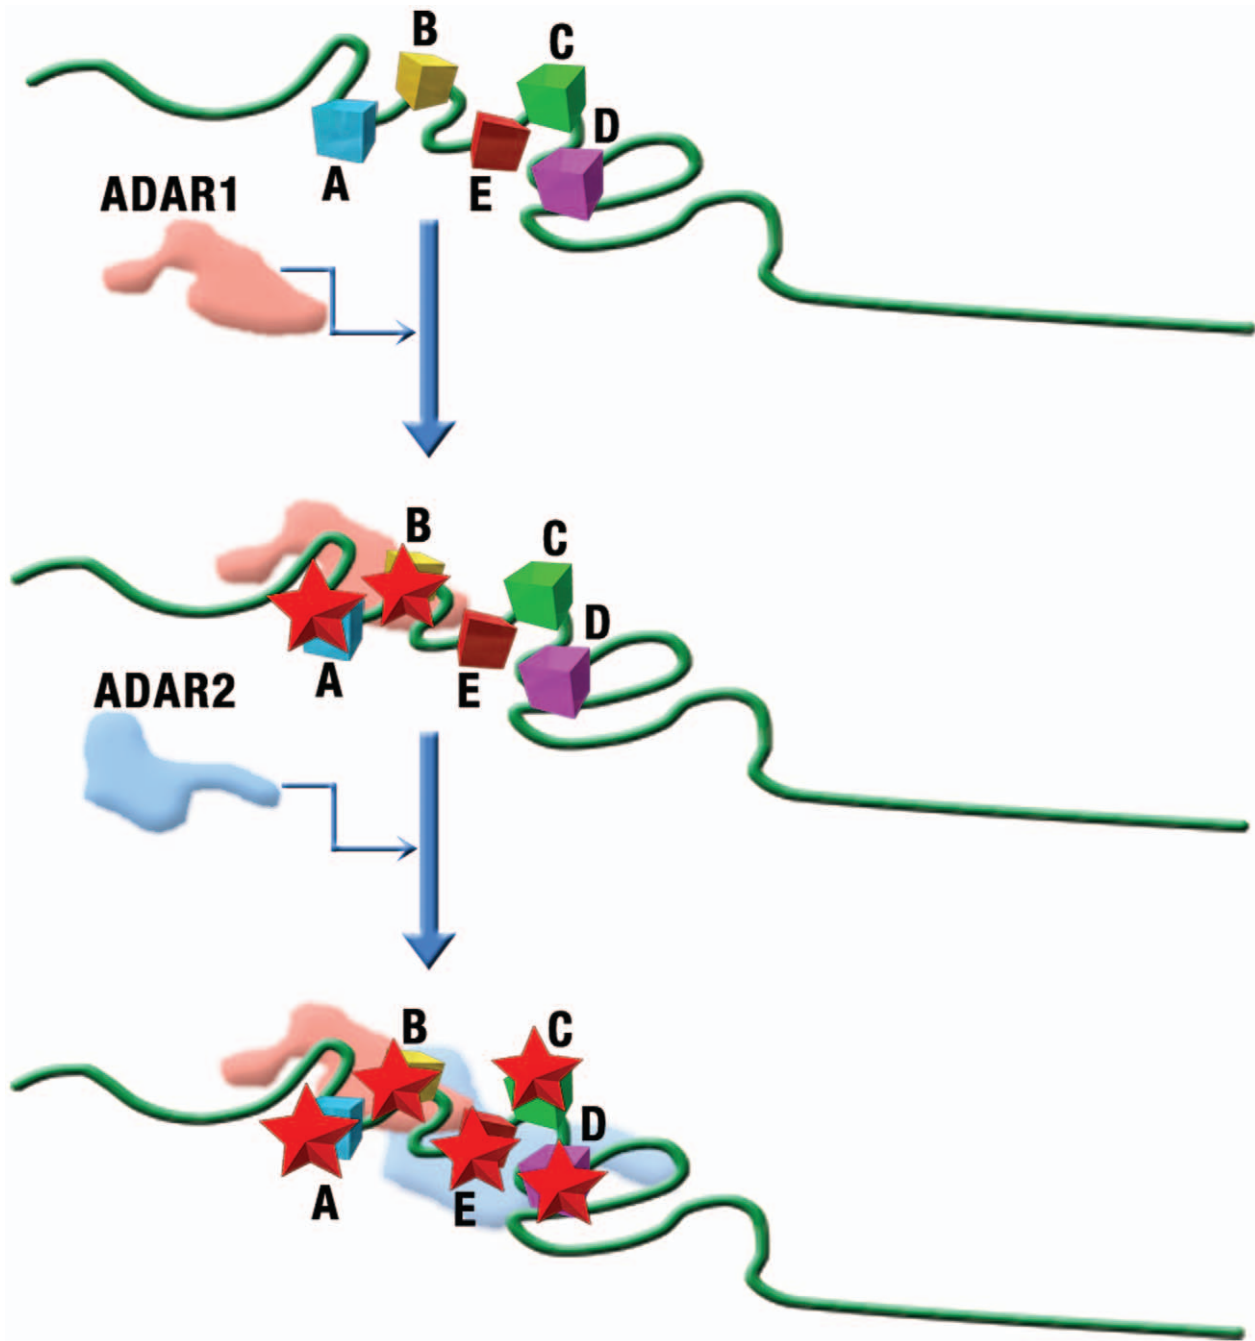

**Figure 6. A hypothetical mechanistic model of concerted action of ADAR1 and ADAR2 in 5-HT<sub>2c</sub>R mRNA editing.** The squares denote the 5 distinct editing sites and the stars denote editing. The figure is not to scale.  
doi:10.1371/journal.pcbi.1002663.g006

This distance was computed for all pairs of editing sites, and the distance matrix served as input for a single linkage (shortest-distance) hierarchical clustering. Using the Dice distance, as in [26],

$$D_{XY} = \frac{n_{01} + n_{10}}{n_{01} + n_{10} + 2n_{11}}$$

had a negligible effect on the results (Figure 1, Supplementary Figure S2). Edges were given support between 0 and 1 according to the number of individuals in which they are supported.

#### Identification of the probabilistic model that best describes the relationship between the editing sites

The editing state of a site is a random variable. Thus, the joint probability distribution  $P(A, B, E, C, D)$  is the ultimate description of the dependencies among the five serotonin receptor editing sites. Any joint probability distribution can be decomposed in many different ways as a product of conditional and marginal probabilities, where each decomposition may represent different dependencies among the sites. For example, the joint probability distribution of two random variables can be decomposed in three ways:  $P(X_1) \cdot P(X_2|X_1)$ ,  $P(X_2) \cdot P(X_1|X_2)$ , and  $P(X_1) \cdot P(X_2)$ . The

first two models represent dependency between  $X_1$  and  $X_2$ , whereas the third model represents independence between  $X_1$  and  $X_2$ . There is a recursive formula for computing the number of possible decomposition for any given number of random variables [36]. In our case, the joint probability distribution of five random variables can be decomposed in 29,281 different ways. Importantly, many of these decompositions are redundant in the sense that several decompositions can describe essentially the same probabilistic model. In the two-random variable example above, Bayes law renders equivalence between the first two decompositions,  $P(X_1) \cdot P(X_2|X_1) = P(X_2) \cdot P(X_1|X_2)$ . A set of equivalent decompositions is denoted *equivalence class*. There is no known general formula to compute the number of equivalence classes for a given number of random variables. However, there is an algorithm allowing one to tell, given two decompositions, whether they belong to the same equivalence class or not [37].

Here we propose a technique to find the joint probability distribution that fits best to the data. This technique, being exponential with the number of editing sites, is useful when there is a small number of editing sites, as in the present case and in several other functionally important cases of mRNA editing (e.g., kainate 2 glutamate receptor or Cav1.3 channel) [38,39]. In a nutshell, we scanned through the entire set of 29,281 possible decompositions, and constructed the full set of equivalence classes. Then, we tested which of the equivalence classes fits the data best (see details below).

### Compiling the full set of equivalence classes

In order to enumerate all the possible decompositions of  $P(A, B, E, C, D)$ , we used Steinsky's ranking algorithm, that allows for a one-to-one mapping between the set of all  $I$  decompositions and the integers  $0, 1, 2, \dots, (I-1)$  [36]. Then, we scanned through the list of decompositions by a series of pairwise comparisons, and kept only a single decomposition from each equivalence class. In this way, we found that the joint probability distribution of five random variables can be decomposed into 8,782 equivalence classes (Supplementary Table S1).

### Scoring equivalence classes

A Bayesian network provides a compact graphical representation of a decomposition. It is a directed acyclic graph (DAG) in which the nodes are the random variables, and an edge leading from a node to each of its children (a parent of a node  $x$  is a node upon which  $x$  is conditionally dependent in the decomposition). In the context of Bayesian networks, the collection of DAGs that represent equivalence class is called *Markov equivalence class*. For convenience, we shall hereinafter use *probabilistic model* as a synonym to equivalence class or to Markov equivalence class. Bayesian networks have been proved as a very efficient tool to facilitate calculations on probabilistic models.

In order to score how well each probability model fits the observed data, we used two alternative scoring methods. The first is based on a maximum-likelihood (ML) procedure, and the second is based on Bayesian inference. Below, we describe both methods.

**Maximum-likelihood scoring.** Let  $\text{Pa}(x)$  be the set of parents of node  $x$ .  $\text{Pa}(x)$  may be empty, or may consists one or more nodes. For example, in the model  $P(X_1) \cdot P(X_2|X_1)$ ,  $\text{Pa}(x_1) = \{\}$ , and  $\text{Pa}(x_2) = \{x_1\}$ . Let  $\theta_{x|u}$  be the probability that  $x=1$  given that the editing state of the parents of  $x$  is  $u$ . For example, in the model  $P(X_1) \cdot P(X_2|X_1)$ ,  $\theta_{x_1|\{\}}$  is the probability  $\Pr(x_1=1)$ ,  $\theta_{x_2|\{0\}}$  is the probability  $\Pr(x_2=1|x_1=0)$ , and  $\theta_{x_2|\{1\}}$  is the probability  $\Pr(x_2=1|x_1=1)$ . A probabilistic model is characterized by the collection of these parameters,  $\{\theta_{x|u}\}_{x,u}$ . Let  $n_x(\cdot|u)$

be the number of measurements (mRNA molecules) in which the editing state of  $\text{Pa}(x)$  is  $u$ . Similarly, let  $n_x(1|u)$  be the number of measurements in which  $x=1$  and the editing state of  $\text{Pa}(x)$  is  $u$ . Likewise,  $n_x(0|u)$  is the number of measurements in which  $x=0$  and the editing state of  $\text{Pa}(x)$  is  $u$ . Clearly,  $n_x(\cdot|u) = n_x(0|u) + n_x(1|u)$ . The maximum-likelihood estimate of  $\theta_{x|u}$  for a given probabilistic model is

$$\hat{\theta}_{x|u} = \frac{n_x(1|u)}{n_x(\cdot|u)}$$

[40,41]. The log of the maximum likelihood for a given probabilistic model is, up to an additive constant,

$$\ell = \sum_x \sum_u n_x(1|u) \ln \hat{\theta}_{x|u} + n_x(0|u) \ln (1 - \hat{\theta}_{x|u})$$

where the first summation is over all the nodes, and the second summation is over all the possible editing states of  $\text{Pa}(x)$ . In order to properly compare the different probabilistic models, we have to take into account the fact that the models differ by the number of parameters that characterize them,  $\{\theta_{x|u}\}_{x,u}$ . For example, as already pointed out above, the model  $P(X_1) \cdot P(X_2|X_1)$  is characterized by three parameters:  $\theta_{x_1|\{\}}$ ,  $\theta_{x_2|\{0\}}$ , and  $\theta_{x_2|\{1\}}$ . In contrast, the model  $P(X_1) \cdot P(X_2)$  is characterized by only two parameters:  $\theta_{x_1|\{\}}$ , and  $\theta_{x_2|\{\}}$ . Thus, we employ the Bayesian Information Criterion (BIC) technique [42], and compute for each model the quantity

$$BIC = -2\ell + d \ln n$$

where  $d$  is the number of parameters in the model, and  $n$  is the total number of measurements (mRNA molecules). The model with the minimum value of BIC is the one that best fits the data.

We also employed a similar method known as the Akaike Information Criterion (AIC) technique [43]. The two techniques yielded the same ranking of the best probability models. In human, BIC and AIC are highly correlated ( $\rho = 0.89$ ), and yield identical order for the first 75 best models. In rat, the correlation between BIC and AIC is somewhat lower ( $\rho = 0.55$ ), but still yield identical order for the first 9 best models.

### Bayesian scoring

The Bayesian learning formalism requires assumptions about the prior probability of the parameters  $\{\theta_{x|u}\}_{x,u}$ . We used the Dirichlet priors, which is the standard choice of priors in this kind of problems because it bears desirable properties such as global and local parameter independence [40]. For each node  $x$ , and for each editing state of its parents  $u$ , the Dirichlet priors are specified by two parameters that we denote  $m_x(1|u)$  and  $m_x(0|u)$ . The use of these priors can be conceived as adding another  $m$  pseudo-measurements to the observed  $n$  measurements, where  $m_x(1|u)$  is the number of pseudo-measurements in which  $x=1$  and the editing state of  $\text{Pa}(x)$  is  $u$ , and  $m_x(0|u)$  is the number of pseudo-measurements in which  $x=0$  and the editing state of  $\text{Pa}(x)$  is  $u$ . We denote by  $m_x(\cdot|u)$  the number of pseudo-measurements in which the editing state of  $\text{Pa}(x)$  is  $u$ ,  $m_x(\cdot|u) = m_x(0|u) + m_x(1|u)$ . The Bayesian Score (BS) of a probabilistic model is given by

$$BS = \sum_x BS(x)$$

where the summation is over all the nodes, and

$$BS(x) = \log \prod_u \frac{\Gamma[m_x(:|u)]}{\Gamma[m_x(:|u) + n_x(:|u)]} \cdot \frac{\Gamma[m_x(0|u) + n_x(0|u)]}{\Gamma[m_x(0|u)]} \cdot \frac{\Gamma[m_x(1|u) + n_x(1|u)]}{\Gamma[m_x(1|u)]}$$

where the product is over all possible editing states of  $\text{Pa}(x)$ , and  $\Gamma$  is the gamma function [40].

We generated the set of pseudo-measurements to consist exactly one of each of the possible editing states of the five editing sites. That is, the pseudo-measurements consist a single measurement 00000, a single measurement 00001, etc. If we denote the number of editing sites by  $k$  ( $k=5$ ), then the set of pseudo-measurements consists of  $2^k$  measurements. If we denote the number of parents of node  $x$  by  $p_x$ , then  $m_x(:|u) = 2^{k-p_x}$ , and  $m_x(0|u) = m_x(1|u) = 2^{k-p_x-1}$ . This gives

$$BS(x) = \log \prod_u \frac{\Gamma(2^{k-p_x})}{\Gamma[2^{k-p_x} + n_x(:|u)]} \cdot \frac{\Gamma[2^{k-p_x-1} + n_x(0|u)]}{\Gamma(2^{k-p_x-1})} \cdot \frac{\Gamma[2^{k-p_x-1} + n_x(1|u)]}{\Gamma(2^{k-p_x-1})}$$

which is just

$$BS(x) = 2^{p_x} \cdot [\log \Gamma(2^{k-p_x}) - 2 \log \Gamma(2^{k-p_x-1})] + \sum_u \{ \log \Gamma[2^{k-p_x-1} + n_x(0|u)] + \log \Gamma[2^{k-p_x-1} + n_x(1|u)] - \log \Gamma[2^{k-p_x} + n_x(:|u)] \}$$

If node  $x$  has no parents, then  $\text{Pa}(x) = \{\}$ ,  $p_x = 0$ ,  $n_x(:|u) = n$ , and the formula further simplifies to

$$BS(x) = \log \Gamma(2^k) - 2 \log \Gamma(2^{k-1}) + \log \Gamma[2^{k-1} + n_x(0|u)] + \log \Gamma[2^{k-1} + n_x(1|u)] - \log \Gamma[2^k + n_x(:|u)]$$

## Visualization

A whole Markov equivalence class can be described by a partial-directed acyclic graph (pDAG) [40,41], which is a graph made of both directed and undirected edges. If an edge can be oriented differently in DAGs belonging to the same Markov equivalence class, it would be undirected. In this work, whenever a probabilistic model is visualized as a Bayesian network, the pDAG representation is employed.

## Supporting Information

**Figure S1 Frequency of the editing statuses.** (blue) human subjects with major depression; (cyan) normal human controls; (orange) transacted rats; (red) normal rat controls. (DOC)

**Figure S2 Clustering of the five editing sites using Dice distance.** (a) human; (b) rat. (DOC)

**Figure S3 a) AIC score, and b) Bayesian score for human models  $M_0$  to  $M_{10}$ .** The pDAGs associated with each model are identical to those obtained by the BIC score (Figure 2). (DOC)

**Figure S4 a) AIC score, and b) Bayesian score for rat models  $M_0$  to  $M_{10}$ .** The pDAGs associated with each model are identical to those obtained by the BIC score (Figure 3), except for the  $M_8$  model under the AIC scores, which is depicted in Figure S5. (DOC)

**Figure S5 pDAG for the rat  $M_8$  model.** a) as obtained from the BIC and from the Bayes scores; b) as obtained from the AIC score. The difference is in the single edge connecting C to D in the BIC and Bayes scores, which is replaced by an edge connecting C and E in the AIC score. (DOC)

**Figure S6 Level of support of each edge in all individual best-fitting models with fixed number of edges.** The results are for AIC scores in human. (DOC)

**Figure S7 Level of support of each edge in all individual best-fitting models with fixed number of edges.** The results are for Bayes scores in human. (DOC)

**Figure S8 Level of support of each edge in all individual best-fitting models with fixed number of edges.** The results are for AIC scores in rat. (DOC)

**Figure S9 Level of support of each edge in all individual best-fitting models with fixed number of edges.** The results are for Bayes scores in rat. (DOC)

**Table S1 Number and composition of the mRNA molecules collected for human and rat.** (DOC)

**Table S2 The  $\phi$ -coefficient between the editing sites for (a) human, and (b) rat.** All coefficients are significant (FDR corrected), except for the pair (D,E) in human and (A,E) in rat. Errors are standard deviations. (DOC)

**Table S3 The estimated parameters of the best-fitting models in human.** The models are shown in Figure 2. (XLS)

**Table S4 The estimated parameters of the best-fitting models in rat.** The models are shown in Figure 3. (XLS)

**Table S5 Statistics on the individual best-models for AIC scores in human.** The statistics for AIC is very similar to BIC, and we report here only those models for which the AIC scores behave differently from the BIC scores (changes are in red). The models are shown in Figure 3. (DOC)

**Table S6 Statistics on the individual best-models for Bayes scores in human.** The statistics for Bayes score is very similar to BIC, and we report here only those models for which the Bayes scores behave differently from the BIC scores (changes are in red). (DOC)

**Table S7 Statistics on the individual best-models for BIC scores in rat.** For each family of models with the same

number of edges, we report all significantly enriched best-models found among all 19 individuals. The ID of the model is its rank (asterisk marks the best model found in the pooled analysis, see Figure 3). The support is the number of individuals that gave this model as the best-fit model.  
(DOC)

**Table S8 Statistics on the individual best-models for AIC scores in rat.** The statistics for AIC is very similar to BIC, and we report here only those models for which the AIC scores behave differently from the BIC scores (changes are in red).  
(DOC)

## References

- Pompeiano M, Palacios JM, Mengod G (1994) Distribution of the serotonin 5-HT<sub>2</sub> receptor family mRNAs: comparison between 5-HT<sub>2A</sub> and 5-HT<sub>2C</sub> receptors. *Brain Res Mol Brain Res* 23: 163–178.
- Pasqualetti M, Ori M, Castagna M, Marazziti D, Cassano GB, Nardi I (1999) Distribution and cellular localization of the serotonin type 2C receptor messenger RNA in human brain. *Neuroscience* 92: 601–611.
- Giorgetti M, Tecott LH (2004) Contributions of 5-HT<sub>2C</sub> receptors to multiple actions of central serotonin systems. *Eur J Pharmacol* 488: 1–9.
- Millan MJ (2005) Serotonin 5-HT<sub>2C</sub> receptors as a target for the treatment of depressive and anxious states: focus on novel therapeutic strategies. *Therapie* 60: 441–460.
- Berg KA, Clarke WP, Cunningham KA, Spampinato U (2008) Fine-tuning serotonin(2c) receptor function in the brain: Molecular and functional implications. *Neuropharmacology* 55: 969–976.
- Werry TD, Loiacono R, Sexton PM, Christopoulos A (2008) RNA editing of the serotonin 5HT<sub>2C</sub> receptor and its effects on cell signalling, pharmacology and brain function. *Pharmacol Ther* 119: 7–23.
- Burns CM, Chu H, Rueter SM, Hutchinson LK, Canton H, et al. (1997) Regulation of serotonin-2C receptor G-protein coupling by RNA editing. *Nature* 387: 303–308.
- Wang Q, O'Brien PJ, Chen CX, Cho DS, Murray JM, et al. (2000) Altered G protein-coupling functions of RNA editing isoform and splicing variant serotonin<sub>2C</sub> receptors. *J Neurochem* 74: 1290–1300.
- Moro O, Lameh J, Hogger P, Sadee W (1993) Hydrophobic amino acid in the i2 loop plays a key role in receptor-G protein coupling. *J Biol Chem* 268: 22273–22276.
- Niswender CM, Copeland SC, Herrick-Davis K, Emeson RB, Sanders-Bush E (1999) RNA editing of the human serotonin 5-hydroxytryptamine 2C receptor silences constitutive activity. *J Biol Chem* 274: 9472–9478.
- Kenakin T (2004) Principles: receptor theory in pharmacology. *Trends Pharmacol Sci* 25: 186–192.
- Gott JM, Emeson RB (2000) Functions and mechanisms of RNA editing. *Annu Rev Genet* 34: 499–531.
- Valente L, Nishikura K (2005) ADAR gene family and A-to-I RNA editing: diverse roles in posttranscriptional gene regulation. *Prog Nucleic Acid Res Mol Biol* 79: 299–338.
- Athanasiadis A, Rich A, Maas S (2004) Widespread A-to-I RNA editing of Alu-containing mRNAs in the human transcriptome. *PLoS Biol* 2: e391.
- Blow M, Futreal PA, Wooster R, Stratton MR (2004) A survey of RNA editing in human brain. *Genome Res* 14: 2379–2387.
- Levanon EY, Eisenberg E, Yelin R, Nemzer S, Halleger M, et al. (2004) Systematic identification of abundant A-to-I editing sites in the human transcriptome. *Nat Biotechnol* 22: 1001–1005.
- Paz-Yaacov N, Levanon EY, Nevo E, Kinar Y, Harmelin A, et al. (2010) Adenosine-to-inosine RNA editing shapes transcriptome diversity in primates. *Proc Natl Acad Sci U S A* 107: 12174–12179.
- Kallman AM, Sahlin M, Ohman M (2003) ADAR2 A→I editing: site selectivity and editing efficiency are separate events. *Nucleic Acids Res* 31: 4874–4881.
- Dawson TR, Sansam CL, Emeson RB (2004) Structure and sequence determinants required for the RNA editing of ADAR2 substrates. *J Biol Chem* 279: 4941–4951.
- Stephens OM, Haudenschild BL, Beal PA (2004) The binding selectivity of ADAR2's dsRBMs contributes to RNA-editing selectivity. *Chem Biol* 11: 1239–1250. DOI: 10.1016/j.chembiol.2004.06.009
- Lehmann KA, Bass BL (2000) Double-stranded RNA adenosine deaminases ADAR1 and ADAR2 have overlapping specificities. *Biochemistry* 39: 12875–12884. bioRxiv 1383g [pii].
- Higuchi M, Maas S, Single FN, Hartner J, Rozov A, et al. (2000) Point mutation in an AMPA receptor gene rescues lethality in mice deficient in the RNA-editing enzyme ADAR2. *Nature* 406: 78–81.
- Hartner JC, Schmittwolf C, Kispert A, Muller AM, Higuchi M, et al. (2004) Liver disintegration in the mouse embryo caused by deficiency in the RNA-editing enzyme ADAR1. *J Biol Chem* 279: 4894–4902. DOI: 10.1074/jbc.M311347200
- Wang Q, Khillan J, Gadue P, Nishikura K (2000) Requirement of the RNA editing deaminase ADAR1 gene for embryonic erythropoiesis. *Science* 290: 1765–1768.
- Du Y, Davisson MT, Kafadar K, Gardiner K (2006) A-to-I pre-mRNA editing of the serotonin 2C receptor: comparisons among inbred mouse strains. *Gene* 382:39–46. Epub 2006 Jun 27: 39–46.
- Enstero M, Daniel C, Wahlstedt H, Major F, Ohman M (2009) Recognition and coupling of A-to-I edited sites are determined by the tertiary structure of the RNA. *Nucleic Acids Res* 37: 6916–6926. DOI: 10.1093/nar/gkp731
- Niswender CM, Herrick-Davis K, Dilley GE, Meltzer HY, Overholser JC, et al. (2001) RNA editing of the human serotonin 5-HT<sub>2C</sub> receptor. alterations in suicide and implications for serotonergic pharmacotherapy. *Neuropsychopharmacology* 24: 478–491.
- Gurevich I, Tamir H, Arango V, Dwork AJ, Mann JJ, et al. (2002) Altered editing of serotonin 2C receptor pre-mRNA in the prefrontal cortex of depressed suicide victims. *Neuron* 34: 349–356.
- Iwamoto K, Kato T (2003) RNA editing of serotonin 2C receptor in human postmortem brains of major mental disorders. *Neurosci Lett* 346: 169–172.
- Dracheva S, Patel N, Woo DA, Marcus SM, Siever LJ, et al. (2008) Increased serotonin 2C receptor mRNA editing: a possible risk factor for suicide. *Mol Psychiatry* 13: 1001–1010.
- Lyddon R, Dwork AJ, Keddache M, Siever LJ, Dracheva S (2012) Serotonin 2c receptor RNA editing in major depression and suicide. *World J Biol Psychiatry*. E-pub ahead of print Mar 9.
- Murray KC, Nakae A, Stephens MJ, Rank M, D'Amico J, et al. (2010) Recovery of motoneuron and locomotor function after spinal cord injury depends on constitutive activity in 5-HT<sub>2C</sub> receptors. *Nat Med* 16: 694–700.
- Navarrete S, Collier L, Cardozo C, Dracheva S (2012) Alterations of serotonin 2C and 2A receptors in response to T10 spinal cord transection in rats. *Neurosci Lett* 506: 74–78.
- Sodhi MS, Airey DC, Lambert W, Burnet PW, Harrison PJ, et al. (2005) A rapid new assay to detect RNA editing reveals antipsychotic-induced changes in serotonin-2C transcripts. *Mol Pharmacol* 68: 711–719.
- Seeburg PH, Hartner J (2003) Regulation of ion channel/neurotransmitter receptor function by RNA editing. *Curr Opin Neurobiol* 13: 279–283.
- Steinsky B (2003) Efficient coding of labeled directed acyclic graphs. *Soft Computing* 7: 350–356.
- Pearl J, Verma TS (1991) A theory of inferred causation. In: KR'91: Principles of knowledge representation and reasoning. San Francisco: Morgan Kaufmann. pp. 441–452.
- Silberberg G, Lundin D, Navon R, Ohman M (2012) Deregulation of the A-to-I RNA editing mechanism in psychiatric disorders. *Hum Mol Genet* 21: 311–321. DOI: 10.1093/hmg/ddr461
- Huang H, Tan BZ, Shen Y, Tao J, Jiang F, et al. (2012) RNA editing of the IQ domain in Ca(v)1.3 channels modulates their Ca(2)-dependent inactivation. *Neuron* 73: 304–316. DOI: 10.1016/j.neuron.2011.11.022
- Pe'er D (2005) Bayesian network analysis of signaling networks: a primer. *Sci STKE* 2005: 14.
- Koller D, Friedman N (2009) Probabilistic Graphical Models: Principles and Techniques. The MIT Press.
- Schwarz G (1978) Estimating the dimension of a model. *Ann Stat* 6: 461–464.
- Akaike H (1974) A new look at the statistical model identification. *IEEE T Automat Contr* 19: 716–723.

**Table S9 Statistics on the individual best-models for Bayes scores in rat.** The statistics for Bayes score is very similar to BIC, and we report here only those models for which the Bayes scores behave differently from the BIC scores (changes are in red).  
(DOC)

## Author Contributions

Conceived and designed the experiments: SD. Performed the experiments: SD. Analyzed the data: LC. Contributed reagents/materials/analysis tools: LC SD EVK. Wrote the paper: LC EVK SD.
