# Supplementary material for: Dependencies among Editing Sites in Serotonin 2C Receptor mRNA
Source: PLoS Comput Biol. 2012 Sep 6;8(9):e1002663. doi: 10.1371/journal.pcbi.1002663 (PMC3435259; doi:10.1371/journal.pcbi.1002663)
Supplement: Table S3 — The estimated parameters of the best-fitting models in human. The models are shown in Figure 2. (XLS) [file pcbi.1002663.s012.xls]

## Sheet: Params
DAG	Number of edges	Node	Parents(Node)	Parents configuration	Theta (Prob Node = 1)
0	1	A			0.780176
		B			0.517243
		E			0.18741
		C			0.532585
		D			0.627559
1	2	A			0.780176
		B	[A]	[0]	0.150755
				[1]	0.620506
		E			0.18741
		C			0.532585
		D			0.627559
153	3	A	[B]	[0]	0.613295
				[1]	0.93593
		B	[D]	[0]	0.282213
				[1]	0.656728
		E			0.18741
		C			0.532585
		D			0.627559
8333	4	A			0.780176
		B	[A]	[0]	0.150755
				[1]	0.620506
		E			0.18741
		C	[A]	[0]	0.302686
				[1]	0.597362
		D	[B]	[0]	0.446236
				[1]	0.796792
3204	5	A	[B E]	[0 0]	0.548256
				[0 1]	0.825093
				[1 0]	0.927567
				[1 1]	0.986029
		B	[D]	[0]	0.282213
				[1]	0.656728
		E			0.18741
		C	[A]	[0]	0.302686
				[1]	0.597362
		D			0.627559
3490	6	A	[B E D]	[0 0 0]	0.451941
				[0 0 1]	0.671561
				[0 1 0]	0.771366
				[0 1 1]	0.885373
				[1 0 0]	0.821249
				[1 0 1]	0.953457
				[1 1 0]	0.975494
				[1 1 1]	0.989493
		B	[D]	[0]	0.282213
				[1]	0.656728
		E			0.18741
		C	[A]	[0]	0.302686
				[1]	0.597362
		D			0.627559
10138	7	A			0.780176
		B	[A D]	[0 0]	0.111387
				[0 1]	0.224512
				[1 0]	0.389074
				[1 1]	0.71673
		E	[B C]	[0 0]	0.109146
				[0 1]	0.380229
				[1 0]	0.11359
				[1 1]	0.162978
		C	[A]	[0]	0.302686
				[1]	0.597362
		D	[A]	[0]	0.348009
				[1]	0.706326
9298	8	A			0.780176
		B	[A E C]	[0 0 0]	0.19528
				[0 0 1]	0.0791481
				[0 1 0]	0.0640178
				[0 1 1]	0.0282402
				[1 0 0]	0.573406
				[1 0 1]	0.74826
				[1 1 0]	0.579586
				[1 1 1]	0.394062
		E	[C]	[0]	0.11113
				[1]	0.254357
		C	[A]	[0]	0.302686
				[1]	0.597362
		D	[A B]	[0 0]	0.317784
				[0 1]	0.518271
				[1 0]	0.52723
				[1 1]	0.815859
14620	9	A	[B E D]	[0 0 0]	0.451941
				[0 0 1]	0.671561
				[0 1 0]	0.771366
				[0 1 1]	0.885373
				[1 0 0]	0.821249
				[1 0 1]	0.953457
				[1 1 0]	0.975494
				[1 1 1]	0.989493
		B			0.517243
		E	[B]	[0]	0.234936
				[1]	0.143053
		C	[A B E]	[0 0 0]	0.320584
				[0 0 1]	0.414025
				[0 1 0]	0.143195
				[0 1 1]	0.230893
				[1 0 0]	0.421488
				[1 0 1]	0.822432
				[1 1 0]	0.617021
				[1 1 1]	0.686019
		D	[B]	[0]	0.446236
				[1]	0.796792
14623	10	A	[B E D]	[0 0 0]	0.451941
				[0 0 1]	0.671561
				[0 1 0]	0.771366
				[0 1 1]	0.885373
				[1 0 0]	0.821249
				[1 0 1]	0.953457
				[1 1 0]	0.975494
				[1 1 1]	0.989493
		B			0.517243
		E	[B]	[0]	0.234936
				[1]	0.143053
		C	[A B E D]	[0 0 0 0]	0.279359
				[0 0 0 1]	0.408654
				[0 0 1 0]	0.426048
				[0 0 1 1]	0.387121
				[0 1 0 0]	0.127318
				[0 1 0 1]	0.158043
				[0 1 1 0]	0.246294
				[0 1 1 1]	0.219084
				[1 0 0 0]	0.365329
				[1 0 0 1]	0.469872
				[1 0 1 0]	0.835065
				[1 0 1 1]	0.810084
				[1 1 0 0]	0.612933
				[1 1 0 1]	0.617878
				[1 1 1 0]	0.665613
				[1 1 1 1]	0.692632
		D	[B]	[0]	0.446236
				[1]	0.796792
10655	11	A			0.780176
		B	[A]	[0]	0.150755
				[1]	0.620506
		E	[A B]	[0 0]	0.106262
				[0 1]	0.0311934
				[1 0]	0.31607
				[1 1]	0.150711
		C	[A B E]	[0 0 0]	0.320584
				[0 0 1]	0.414025
				[0 1 0]	0.143195
				[0 1 1]	0.230893
				[1 0 0]	0.421488
				[1 0 1]	0.822432
				[1 1 0]	0.617021
				[1 1 1]	0.686019
		D	[A B E C]	[0 0 0 0]	0.277516
				[0 0 0 1]	0.406439
				[0 0 1 0]	0.323029
				[0 0 1 1]	0.288779
				[0 1 0 0]	0.507779
				[0 1 0 1]	0.570315
				[0 1 1 0]	0.574703
				[0 1 1 1]	0.537063
				[1 0 0 0]	0.492255
				[1 0 0 1]	0.598849
				[1 0 1 0]	0.540861
				[1 0 1 1]	0.498102
				[1 1 0 0]	0.824767
				[1 1 0 1]	0.827767
				[1 1 1 0]	0.73932
				[1 1 1 1]	0.762508
