# Supplementary material for: Dependencies among Editing Sites in Serotonin 2C Receptor mRNA
Source: PLoS Comput Biol. 2012 Sep 6;8(9):e1002663. doi: 10.1371/journal.pcbi.1002663 (PMC3435259; doi:10.1371/journal.pcbi.1002663)
Supplement: Table S4 — The estimated parameters of the best-fitting models in rat. The models are shown in Figure 3. (XLS) [file pcbi.1002663.s013.xls]

## Sheet: Params
DAG	Number of edges	Node	Parents(Node)	Parents configuration	Theta (Prob Node = 1)
0	1	A			0.90167
		B			0.803807
		E			0.0490634
		C			0.33237
		D			0.64611
1	2	A			0.90167
		B	[A]	[0]	0.160197
				[1]	0.873995
		E			0.0490634
		C			0.33237
		D			0.64611
153	3	A	[B]	[0]	0.5791
				[1]	0.980403
		B	[D]	[0]	0.665506
				[1]	0.879558
		E			0.0490634
		C			0.33237
		D			0.64611
435	4	A	[B]	[0]	0.5791
				[1]	0.980403
		B	[C D]	[0 0]	0.59647
				[0 1]	0.864264
				[1 0]	0.795217
				[1 1]	0.911443
		E			0.0490634
		C			0.33237
		D			0.64611
679	5	A	[B]	[0]	0.5791
				[1]	0.980403
		B	[E C D]	[0 0 0]	0.594719
				[0 0 1]	0.865111
				[0 1 0]	0.813657
				[0 1 1]	0.917076
				[1 0 0]	0.629428
				[1 0 1]	0.845304
				[1 1 0]	0.567687
				[1 1 1]	0.793178
		E			0.0490634
		C			0.33237
		D			0.64611
685	6	A	[B C]	[0 0]	0.584957
				[0 1]	0.558671
				[1 0]	0.974767
				[1 1]	0.990462
		B	[E C D]	[0 0 0]	0.594719
				[0 0 1]	0.865111
				[0 1 0]	0.813657
				[0 1 1]	0.917076
				[1 0 0]	0.629428
				[1 0 1]	0.845304
				[1 1 0]	0.567687
				[1 1 1]	0.793178
		E			0.0490634
		C			0.33237
		D			0.64611
459	7	A	[C D]	[0 0]	0.820943
				[0 1]	0.920018
				[1 0]	0.908192
				[1 1]	0.948612
		B	[A E C D]	[0 0 0 0]	0.131862
				[0 0 0 1]	0.224964
				[0 0 1 0]	0.103775
				[0 0 1 1]	0.156216
				[0 1 0 0]	0.0703582
				[0 1 0 1]	0.122646
				[0 1 1 0]	0.030619
				[0 1 1 1]	0.0630522
				[1 0 0 0]	0.695302
				[1 0 0 1]	0.920358
				[1 0 1 0]	0.885794
				[1 0 1 1]	0.958502
				[1 1 0 0]	0.759918
				[1 1 0 1]	0.918502
				[1 1 1 0]	0.618491
				[1 1 1 1]	0.82855
		E			0.0490634
		C			0.33237
		D			0.64611
2885	8	A	[C]	[0]	0.885743
				[1]	0.933663
		B	[A E C]	[0 0 0]	0.17459
				[0 0 1]	0.129787
				[0 1 0]	0.0932516
				[0 1 1]	0.0421609
				[1 0 0]	0.848588
				[1 0 1]	0.932872
				[1 1 0]	0.861757
				[1 1 1]	0.727499
		E			0.0490634
		C			0.33237
		D	[A B C]	[0 0 0]	0.430518
				[0 0 1]	0.472792
				[0 1 0]	0.590917
				[0 1 1]	0.59579
				[1 0 0]	0.359086
				[1 0 1]	0.385873
				[1 1 0]	0.736247
				[1 1 1]	0.661976
6559	9	A	[C D]	[0 0]	0.820943
				[0 1]	0.920018
				[1 0]	0.908192
				[1 1]	0.948612
		B	[A E C D]	[0 0 0 0]	0.131862
				[0 0 0 1]	0.224964
				[0 0 1 0]	0.103775
				[0 0 1 1]	0.156216
				[0 1 0 0]	0.0703582
				[0 1 0 1]	0.122646
				[0 1 1 0]	0.030619
				[0 1 1 1]	0.0630522
				[1 0 0 0]	0.695302
				[1 0 0 1]	0.920358
				[1 0 1 0]	0.885794
				[1 0 1 1]	0.958502
				[1 1 0 0]	0.759918
				[1 1 0 1]	0.918502
				[1 1 1 0]	0.618491
				[1 1 1 1]	0.82855
		E			0.0490634
		C			0.33237
		D	[E C]	[0 0]	0.655876
				[0 1]	0.637442
				[1 0]	0.615747
				[1 1]	0.508181
4311	10	A			0.90167
		B	[A E]	[0 0]	0.164582
				[0 1]	0.081007
				[1 0]	0.87736
				[1 1]	0.808239
		E			0.0490634
		C	[A B E]	[0 0 0]	0.232679
				[0 0 1]	0.249795
				[0 1 0]	0.176151
				[0 1 1]	0.124736
				[1 0 0]	0.186855
				[1 0 1]	0.56646
				[1 1 0]	0.362975
				[1 1 1]	0.358803
		D	[A B E C]	[0 0 0 0]	0.430928
				[0 0 0 1]	0.480945
				[0 0 1 0]	0.423639
				[0 0 1 1]	0.348105
				[0 1 0 0]	0.591353
				[0 1 0 1]	0.597017
				[0 1 1 0]	0.575845
				[0 1 1 1]	0.532203
				[1 0 0 0]	0.358254
				[1 0 0 1]	0.400277
				[1 0 1 0]	0.378582
				[1 0 1 1]	0.326503
				[1 1 0 0]	0.738705
				[1 1 0 1]	0.665284
				[1 1 1 0]	0.684464
				[1 1 1 1]	0.591023
10655	11	A			0.90167
		B	[A]	[0]	0.160197
				[1]	0.873995
		E	[A B]	[0 0]	0.057413
				[0 1]	0.0265304
				[1 0]	0.0741025
				[1 1]	0.0450289
		C	[A B E]	[0 0 0]	0.232679
				[0 0 1]	0.249795
				[0 1 0]	0.176151
				[0 1 1]	0.124736
				[1 0 0]	0.186855
				[1 0 1]	0.56646
				[1 1 0]	0.362975
				[1 1 1]	0.358803
		D	[A B E C]	[0 0 0 0]	0.430928
				[0 0 0 1]	0.480945
				[0 0 1 0]	0.423639
				[0 0 1 1]	0.348105
				[0 1 0 0]	0.591353
				[0 1 0 1]	0.597017
				[0 1 1 0]	0.575845
				[0 1 1 1]	0.532203
				[1 0 0 0]	0.358254
				[1 0 0 1]	0.400277
				[1 0 1 0]	0.378582
				[1 0 1 1]	0.326503
				[1 1 0 0]	0.738705
				[1 1 0 1]	0.665284
				[1 1 1 0]	0.684464
				[1 1 1 1]	0.591023
